# Supplementary material
Source: MDPI journal article supplement (https://www.mdpi.com/2311-7524/8/4/320)
Supplement: s1 [file s1]

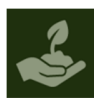

## Article

# Supplementary Materials: The Variation of Soil Phosphorus Fractions and Microbial Community Composition under Consecutive Cucumber Cropping in a Greenhouse

Ting Bian, Shiwei Zheng, Xiao Li, Shuang Wang, Xiaolan Zhang, Zhen Wang, Xiaoxia Li, Hongdan Fu and Zhouping Sun

**Table S1.** Variations in soil basic properties with increasing continuous cropping rounds in the greenhouse soil.

| Cropping rounds | pH         | EC         | TK (g·kg <sup>-1</sup> ) | AN (mg·kg <sup>-1</sup> ) | AK (mg·kg <sup>-1</sup> ) |
|-----------------|------------|------------|--------------------------|---------------------------|---------------------------|
| 1               | 7.27±0.02a | 0.18±0.01b | 13.10±0.51b              | 21.58±0.58b               | 237.54±14.88c             |
| 9               | 7.28±0.03a | 0.23±0.01a | 18.60±0.13a              | 54.83±2.54a               | 380.27±15.43b             |
| 13              | 7.26±0.02a | 0.23±0.00a | 19.03±0.63a              | 64.75±5.05a               | 298.72±7.11bc             |
| 21              | 7.23±0.02a | 0.27±0.01a | 19.03±0.37a              | 68.83±4.21a               | 816.85±37.60a             |

Different letters indicate significant difference among the treatments on  $p < 0.05$ .

**Table S2.** Changes of soil inorganic phosphorus and organic phosphorus contents and relative distribution of P after long-term continuous cropping.

| Continuous cropping rounds | Contents of P (mg·kg <sup>-1</sup> ) |                 |                 | Relative distribution of P (%) |                 |
|----------------------------|--------------------------------------|-----------------|-----------------|--------------------------------|-----------------|
|                            | TP <sub>i</sub>                      | TP <sub>o</sub> | TP <sub>t</sub> | TP <sub>i</sub>                | TP <sub>o</sub> |
| 1                          | 807.25±6.69c                         | 98.06±12.75d    | 905.31±6.62c    | 89.19±1.33ab                   | 10.81±1.33bc    |
| 9                          | 2087.41±75.83b                       | 235.73±11.92c   | 2323.14±63.91b  | 89.81±0.79a                    | 10.19±1.33c     |
| 13                         | 2030.94±44.67b                       | 385.04±4.80b    | 2415.98±49.34b  | 84.06±0.14c                    | 15.94±1.33a     |
| 21                         | 2914.94±145.50a                      | 505.76±14.18a   | 3420.70±136.98a | 85.15±0.90bc                   | 14.85±1.33ab    |

Different letters indicate significant difference among the treatments on  $p < 0.05$ .

**Table S3.** The relative distribution of P after long-term continuous cropping.

| Continuous cropping rounds | Relative distribution of P (%) |                     |              |
|----------------------------|--------------------------------|---------------------|--------------|
|                            | Labile P                       | Moderately labile P | Non-labile P |
| 1                          | 27.78±1.49a                    | 54.66±1.19b         | 17.55±0.34a  |
| 9                          | 24.86±0.14a                    | 63.87±0.34a         | 11.24±0.19b  |
| 13                         | 23.52±0.91a                    | 65.67±0.92a         | 10.82±0.50b  |
| 21                         | 26.66±1.65a                    | 65.80±1.99a         | 7.54±0.36c   |

Different letters indicate significant difference among the treatments on  $p < 0.05$ .

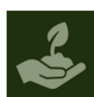**Table S4.** The contents of P fractions and relative distribution of P after long-term continuous cropping.

| Continu-<br>ous crop-<br>ping<br>rounds | Contents of P<br>(mg·kg <sup>-1</sup> ) |                                   |                    |                         |                          |                         |                                   |                    |                          |
|-----------------------------------------|-----------------------------------------|-----------------------------------|--------------------|-------------------------|--------------------------|-------------------------|-----------------------------------|--------------------|--------------------------|
|                                         | Resin-P <sub>i</sub>                    | NaHCO <sub>3</sub> P <sub>i</sub> | NaOHP <sub>i</sub> | Dil. HCl-P <sub>i</sub> | Conc. HCl-P <sub>i</sub> | Residual-P <sub>i</sub> | NaHCO <sub>3</sub> P <sub>o</sub> | NaOHP <sub>o</sub> | Conc. HCl-P <sub>o</sub> |
| 1                                       | 132.02±8.92<br>c                        | 68.83±0.76<br>d                   | 115.18±0.39<br>c   | 340.20±12.49c           | 133.86±1.50<br>b         | 17.16±1.64<br>d         | 50.78±6.79c                       | 39.391±4.57<br>c   | 7.89±2.28b               |
| 9                                       | 319.88±18.6<br>4b                       | 136.29±4.02<br>c                  | 168.30±4.30<br>b   | 1200.50±60.85<br>b      | 158.80±3.46<br>a         | 103.64±2.87<br>a        | 120.95±2.46<br>b                  | 114.73±9.46<br>b   | 0.05±0.05b               |
| 13                                      | 288.46±19.3<br>2b                       | 162.29±1.82<br>b                  | 169.33±8.48<br>b   | 1175.35±22.01<br>b      | 154.28±0.69<br>ab        | 81.23±6.46b             | 117.38±6.91<br>b                  | 241.34±4.43<br>a   | 26.32±1.50b              |
| 21                                      | 502.26±33.9<br>2a                       | 212.27±2.43<br>a                  | 351.59±9.38<br>a   | 1662.04±162.2<br>9a     | 136.85±8.68<br>b         | 49.93±5.28c             | 193.47±4.04<br>a                  | 242.13±15.6<br>4a  | 70.151±1.50<br>b         |

  

| Continu-<br>ous crop-<br>ping<br>rounds | Relative distribution of P<br>(%) |                                   |                    |                         |                          |                         |                                   |                    |                          |
|-----------------------------------------|-----------------------------------|-----------------------------------|--------------------|-------------------------|--------------------------|-------------------------|-----------------------------------|--------------------|--------------------------|
|                                         | Resin-P <sub>i</sub>              | NaHCO <sub>3</sub> P <sub>i</sub> | NaOHP <sub>i</sub> | Dil. HCl-P <sub>i</sub> | Conc. HCl-P <sub>i</sub> | Residual-P <sub>i</sub> | NaHCO <sub>3</sub> P <sub>o</sub> | NaOHP <sub>o</sub> | Conc. HCl-P <sub>o</sub> |
| 1                                       | 14.58±0.94a                       | 7.60±0.08a                        | 12.72±0.05a        | 37.59±1.57b             | 14.79±0.27a              | 1.89±0.18c              | 5.6±0.71a                         | 4.35±0.47c         | 0.87±0.25ab              |
| 9                                       | 13.75±0.44a                       | 5.89±0.33b                        | 7.27±0.38c         | 51.64±1.25a             | 6.84±0.17b               | 4.46±0.01a              | 5.22±0.25a                        | 4.97±0.54bc        | 0.00±0.00b               |
| 13                                      | 11.93±0.64a                       | 6.72±0.17ab                       | 7.00±0.25c         | 48.66±0.57a             | 6.39±0.13b               | 3.35±0.20b              | 4.87±0.32a                        | 10.01±0.39a        | 1.07±0.45ab              |
| 21                                      | 14.75±1.22a                       | 6.23±0.32b                        | 10.29±0.27b        | 48.38±2.95a             | 4.03±0.40c               | 1.47±0.17c              | 5.68±0.34a                        | 7.13±0.69b         | 2.04±0.14a               |

Different letters indicate significant difference among the treatments on  $p < 0.05$ .

**Table S5.** The relative distribution of P<sub>o</sub> after long-term continuous cropping.

| Continuous crop-<br>ping rounds | Relative distribution of P <sub>o</sub><br>(%) |                    |                    |
|---------------------------------|------------------------------------------------|--------------------|--------------------|
|                                 | NaHCO <sub>3</sub> P <sub>o</sub>              | NaOHP <sub>o</sub> | CHCIP <sub>o</sub> |
| 1                               | 51.87±1.93a                                    | 40.32±0.57c        | 7.82±1.97ab        |
| 9                               | 51.47±1.57a                                    | 48.51±1.57b        | 0.02±0.02c         |
| 13                              | 30.49±1.83c                                    | 62.73±1.94a        | 6.78±2.83b         |
| 21                              | 38.32±1.43b                                    | 47.78±1.84b        | 13.90±1.43a        |

Different letters indicate significant difference among the treatments on  $p < 0.05$ .

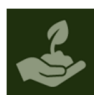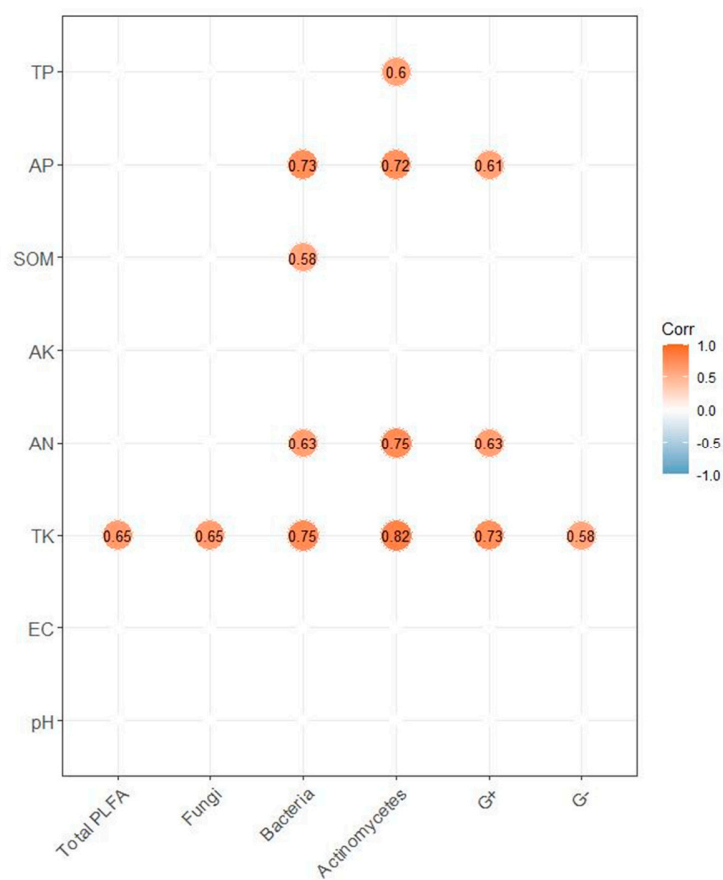

**Figure S1.** Pearson correlation analysis for PLFA and soil basic properties under long-term continuous cropping. EC, electrical conductivity; TP, total phosphorus; TK, total potassium; AN, available nitrogen; AP, available phosphorus; AK, available potassium; SOM, soil organic matter.
